# Supplementary material for: Quantification of dimethylamine in low concentration particulate matter by reducing the concentration of 9-fluorenylmethyl chloroformate
Source: Royal Society of Chemistry journal article supplement (doi:10.1039/d4ay00894d), 2024-11-22
Supplement: d4ay00894d1.pdf [file d4ay00894d1.pdf]

| Assays                           | Amine | Aliquot (g)<br>Amine salt | Correc.<br>Factor | Aliquot (g) | H <sub>2</sub> O<br>volume<br>(mL) | Stock standard<br>solution<br>( $\mu\text{g mL}^{-1}$ ) | Aliquot<br>( $\mu\text{L}$ ) | H <sub>2</sub> O<br>volume<br>(mL) | Working std<br>solution<br>( $\mu\text{g mL}^{-1}$ ) |
|----------------------------------|-------|---------------------------|-------------------|-------------|------------------------------------|---------------------------------------------------------|------------------------------|------------------------------------|------------------------------------------------------|
| Serie I                          | MA    | 0,09591                   | 0,46060           | 0,04418     | 50,34                              | 878                                                     | 100                          | 10                                 | 8.78                                                 |
|                                  | DMA   | 0,10409                   | 0,55286           | 0,05755     | 50,34                              | 1143                                                    | 100                          | 10                                 | 11.43                                                |
| Serie II                         | MA    | 0,02586                   | 0,46060           | 0,01191     | 10                                 | 1191                                                    | 100                          | 10                                 | 11.91                                                |
|                                  | DMA   | 0,0095                    | 0,55286           | 0,00525     | 10                                 | 525                                                     | 100                          | 10                                 | 5.25                                                 |
| Serie III                        | MA    | 0,0939                    | 0,46060           | 0,04325     | 10                                 | 4325                                                    | 100                          | 10                                 | 4.33                                                 |
|                                  | DMA   | 0,0991                    | 0,55286           | 0,05479     | 10                                 | 5479                                                    | 100                          | 10                                 | 5.48                                                 |
| Serie IV                         | MA    | 0,11623                   | 0,46060           | 0,05354     | 10                                 | 5354                                                    | 100                          | 10                                 | 5.35                                                 |
|                                  | DMA   | 0,10083                   | 0,55286           | 0,05574     | 10                                 | 5574                                                    | 100                          | 10                                 | 5.57                                                 |
| Series V-IX<br>(std MeOH,<br>2M) | MA    |                           |                   |             |                                    | 62200                                                   | 160                          | 100                                | 99.5                                                 |
|                                  | DMA   |                           |                   |             |                                    | 90160                                                   | 110                          | 100                                | 99.2                                                 |

Table 1S – Calculations for the preparation of standards from hydrochloride salts and solution in Methanol (2M).

- Correction Factor, corresponding to the molecular weight ratio of "*amine / amine-Fmoc.Cl derivative*"
- MA and DMA, which correspond to the abbreviations for methylamine and dimethylamine, respectively

|                               | Final concentration    | Peak Area        | Final concentration    | Peak Area          |
|-------------------------------|------------------------|------------------|------------------------|--------------------|
|                               | (ng mL <sup>-1</sup> ) | Methylamine salt | (ng mL <sup>-1</sup> ) | Dimethylamine salt |
| <b>Serie I</b>                | Blank                  | 6.2              | Blank                  | 37                 |
|                               |                        | 3.8              |                        | 31                 |
|                               |                        | 3.6              |                        | 32                 |
|                               | 29                     | 48               | 38                     | 202                |
|                               |                        | 60               |                        | 208                |
| <b>Serie II</b>               | Blank                  | 9.9              | Blank                  | 45                 |
|                               |                        | 6.5              |                        | 30                 |
|                               |                        | 6.1              |                        | 41                 |
|                               |                        | 4.9              |                        | 26                 |
|                               | 15                     | 41               | 19                     | 146                |
|                               |                        | 35               |                        | 137                |
|                               |                        | 26               |                        | 115                |
|                               | 29                     | 49               | 38                     | 238                |
|                               |                        | 53               |                        | 238                |
|                               | 40                     | 80               |                        | 235                |
|                               |                        | 94               |                        | 224                |
|                               | 79                     |                  | 209                    |                    |
|                               | 202                    |                  |                        |                    |
| <b>Serie III</b>              | Blank                  | 9.5              | Blank                  | 47                 |
|                               |                        | 9.9              |                        | 41                 |
|                               |                        | 7.3              |                        | 32.5               |
|                               | 15                     | 25               | 18                     | 155                |
|                               |                        | 17               |                        | 123                |
|                               |                        | 13               |                        | 131                |
|                               | 30                     | 50               | 37                     | 218                |
|                               | 32                     |                  | 217                    |                    |
|                               | 26                     |                  |                        |                    |
| <b>Serie IV</b>               | BL                     | 3.6              | BL                     | 11                 |
|                               | 24                     | 33               | 24                     | 110                |
|                               |                        | 26               |                        | 97                 |
|                               | 48                     | 56               | 48                     | 260                |
|                               | 34                     |                  | 192                    |                    |
| <b>Serie V</b>                | Blank                  | 3.2              | Blank                  | 37                 |
|                               |                        | 3.0              |                        | 43.6               |
|                               | 38                     | 79               | 45                     | 231                |
|                               |                        | 72               |                        | 233                |
|                               |                        |                  | 67                     | 150                |
|                               |                        |                  |                        | 274                |
|                               |                        |                  |                        | 233                |
|                               |                        |                  | 217                    |                    |
| <b>Serie VI</b>               | Blank                  | 2                | Blank                  | 37.4               |
|                               |                        | 3.5              |                        | 41                 |
|                               | 38                     | 73               | 45                     | 231                |
|                               |                        | 103              |                        | 244                |
|                               |                        | 87               |                        | 237                |
| <b>Serie VII</b>              | Blank                  | 2.9              | Blank                  | 30                 |
|                               |                        | 1.7              |                        | 41                 |
|                               | 38                     | 75               | 89                     | 495                |
|                               |                        | 96               |                        | 361                |
|                               | 71                     |                  |                        |                    |
| <b>Intermediate Precision</b> |                        | 0.33             |                        | 0.12               |

Table 2S –Chromatographic peak area obtained from the analyses of blanks and standard solutions prepared in different days from hydrochloride salt standards. The data has been grouped according to the final concentration of the standard, and the intermediate precision derived from this is included.

|                               | Final<br>concentration<br>(ng mL <sup>-1</sup> ) | Peak Area   |               |
|-------------------------------|--------------------------------------------------|-------------|---------------|
|                               |                                                  | Methylamine | Dimethylamine |
| <b>Serie I</b>                | <b>Blank</b>                                     | 4.3         | 55            |
|                               |                                                  | 3.9         | 52            |
|                               |                                                  | 4.5         | 55            |
|                               | <b>66</b>                                        | 105         | 325           |
|                               |                                                  | 133         | 374           |
|                               |                                                  | 129         | 359           |
| <b>Serie II</b>               | <b>Blank</b>                                     | 6.6         | 47            |
|                               |                                                  | 4.2         | 42            |
|                               |                                                  | 3.7         | 38            |
|                               | <b>66</b>                                        | 103         | 323           |
|                               |                                                  | 90          | 290           |
|                               |                                                  | 95          | 324           |
| <b>Serie III</b>              | <b>BL</b>                                        | 12          | 36            |
|                               |                                                  | 9.2         | 44            |
|                               | <b>34</b>                                        | 63          | 255           |
|                               |                                                  | 50          | 190           |
|                               | <b>66</b>                                        | 44          | 178           |
|                               |                                                  | 106         | 214           |
|                               |                                                  | 84          | 222           |
|                               |                                                  | 100         | 239           |
| <b>Serie IV</b>               | <b>Blank</b>                                     | 11          | 23.5          |
|                               |                                                  | 7.6         | 11            |
|                               |                                                  | 48          | 196           |
|                               | <b>27</b>                                        | 38          | 185           |
|                               |                                                  | 29          | 181           |
|                               | <b>33</b>                                        | 63          | 257           |
|                               |                                                  | 36          | 221           |
|                               | <b>66</b>                                        | 59          | 200           |
|                               |                                                  | 85          | 392           |
| 139                           |                                                  | 432         |               |
| <b>Serie V</b>                | <b>Blank</b>                                     | 7.2         | 35            |
|                               |                                                  | 4.0         | 35.7          |
|                               |                                                  | 11          | 92.8          |
|                               | <b>17</b>                                        | 11.6        | 93.8          |
|                               |                                                  | 13.2        | 103.8         |
|                               | <b>33</b>                                        | 87          | 211.8         |
|                               |                                                  | 91          | 215.8         |
|                               |                                                  | 80          | 203.8         |
|                               | <b>66</b>                                        | 124         | 463           |
| 131                           |                                                  | 475.8       |               |
| <b>Intermediate Precision</b> |                                                  | 0.28        | 0.24          |

Table 3S –Chromatographic peak area obtained from the analyses of blanks and standard solutions prepared in different days from standard solution in methanol (2M). The data has been grouped according to the final concentration of the standard, and the intermediate precision derived from this is included.

| Blanks                        | Peak Area   | Peak Area     |
|-------------------------------|-------------|---------------|
|                               | Methylamine | Dimethylamine |
| <b>Serie I</b>                | 7.3         | 29.6          |
|                               | 7.8         | 33.0          |
| <b>Serie II</b>               | 9.9         | 41.0          |
|                               | 7.3         | 32.5          |
| <b>Serie III</b>              | 6.1         | 48.2          |
|                               | 4.9         | 41.0          |
| <b>Serie IV</b>               | 10          | 44.5          |
|                               | 6.5         | 30.0          |
| <b>Serie V</b>                | 6.2         | 37.0          |
|                               | 8.9         | 26.2          |
|                               | 6.8         | 24.8          |
| <b>Serie VI</b>               | 7.0         | 20.3          |
|                               | 6.3         | 26.6          |
|                               | 4.1         | 24.6          |
|                               | 3.4         | 23.1          |
| <b>Serie VII</b>              | 6.2         | 37.0          |
|                               | 3.8         | 31.3          |
|                               | 3.6         | 32.0          |
| <b>Serie VIII</b>             | 9.9         | 44.5          |
|                               | 6.5         | 30.0          |
|                               | 6.1         | 48.2          |
|                               | 4.9         | 41.0          |
| <b>Serie IX</b>               | 9.5         | 47.0          |
|                               | 9.9         | 41.0          |
| <b>Mean</b>                   | 7 ± 2.1     | 35 ± 8.5      |
| <b>Intermediate Precision</b> | 0.21        | 0.16          |

Table 4S –Chromatographic peak area obtained from the analyses of blanks in a work area that was free of standards. The data has been grouped according to the day of preparation, and the intermediate precision derived from this is included.

### Estimation of the limits of detection (LOD) and quantification (LOQ)

These values were considered as the concentrations corresponding to the area calculated as the sum of the background plus three (LOD) and ten times (LOQ) multiplied this value by the pooled relative standard deviation ( $RSD_{pooled}$ ) of the blank solutions. Limit values were then calculated as follows:

$$LOD = (\bar{A}_{blank} + 3 * \bar{A}_{blank} * RSD_{pooled}) * (CC_{stand} / \bar{A}_{stand})$$

$$LOQ = (\bar{A}_{blank} + 10 * \bar{A}_{blank} * RSD_{pooled}) * (CC_{stand} / \bar{A}_{stand})$$

Where:

- $\bar{A}_{blank}$  corresponds to the average area obtained from the measured blank solutions,
- $RSD_{pooled}$  is the pooled relative standard deviation derived from the measured blank solutions from the equation (1),
- $CC_{stand}$  is the concentration of the standard solution at low levels (around 30 ng mL<sup>-1</sup> was chosen as concentration level)
- $\bar{A}_{stand}$  is the mean area obtained from the analysis of the standards. This mean value was calculated from the peak area corrected peak areas previously corrected with respect to the background measurements obtained in the analysis batch.

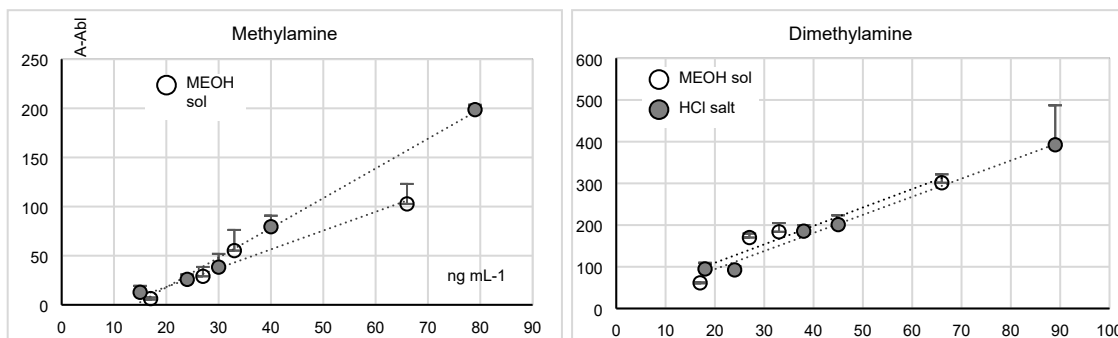

Figure 1S – Calibration adjustment for methylamine and dimethylamine from the results after analysis of hydrochloride salt standards. The areas of the peaks were corrected by the corresponding blank areas of the blanks in each batch measured.

### Chromatographic analysis of BTEX

Samples were taken into commercial sorbent tubes supplied by Markes International Ltd (UK) filled with Tenax TA/Carbograph 1TD/Carboxen 1003 (C3-AAXX-5266). Sampling flow was 80 mL min<sup>-1</sup> for 2 hours respectively. After sampling, the tubes were capped and stored at 4°C until transportation to the laboratory. Analysis were performed before one week.

Samples were subsequently analyzed using a gas chromatograph/mass spectrometer, GC/MS (Agilent 6890/5975B, Santa Clara, USA) coupled to a thermal desorption, TD (Unity, Markes). The thermal desorption system worked as follows: pre-purge 6 min at a flow rate of 50 mL min<sup>-1</sup>, primary desorption at 280°C for 5 min with a flow rate of 30 mL min<sup>-1</sup>, no inlet split, cold trap low 25°C, pre-trap fire purge 3 min at 50 mL min<sup>-1</sup>, cold trap high at 300°C for 6 min, outlet split 10 mL min<sup>-1</sup>, and flow path temperature 200°C. The cold trap “Air Toxic Analyser” (Markes) was used.

Separation was achieved using a DB-624-MS column (60 m x 0.25 mm i.d. x 1,40 µm film thickness) (J&W Scientific, USA). The column oven temperature was maintained at 40 °C for the initial 5 min, then increased at 6 °C min<sup>-1</sup> up to 220 °C and held for 3 min. The injector port was set at 250°C and the transfer line from TD to GC at 300°C. Samples were injected in splitless mode, using helium as carrier gas with a flow rate of 1.0 mL min<sup>-1</sup>. MS was operated in EI mode at 70 eV. The ion source temperature was 230°C and the quadrupole temperature 100°C, operating in the SCAN mode (50-250 uma).

Calibration was achieved using liquid standards in methanol, 5 µL of which were injected in clean sorbent tubes through a calibration loading rig (Markes) while purging with nitrogen for 3 min. A standard including 18 VOCs (n-C10 to n-C14, BTEX, α- and β-pinene, camphene, limonene benzyl alcohol 3-isopropyltoluene, 1,2,3-trifluorobenzene and propionic acid) in methanol was custom prepared and used for calibration at both laboratories LM24-CUS-72074 (Labmix, Hamminkein, Germany).

The standard was diluted to inject solutions in the range 0.4-150 ng per tube for each compound. Field blanks were taken each day of campaign, and data were blank corrected. The method detection limits (MDLs) were calculated as three times the standard deviation for each target compound concentration in spiked samples (n=7, spiked amount 0.5 ng), and were in the range 0.2-0.5 ng.

Precision, determined from five replicates analysis of a standard of 2 ng was within 3% for α-pinene to 16% for n-C14.

|                 | 12/07/2022  | 13/07/2022 | 14/07/2022 | 15/07/2022 | 16/07/2022 | 17/07/2022 | 18/07/2022 | 19/07/2022 | Intermediate Precision |
|-----------------|-------------|------------|------------|------------|------------|------------|------------|------------|------------------------|
| PM              | 38,52       | 34,84      | 58,46      | 44,48      | 48,00      | 35,89      | 49,65      | 26,87      |                        |
| Methylamine     | 2,3±0.50    | 3.0±0.26   | 2,3±0.22   | 1,9±0.11   | 1,3±0.16   | 0,8±0.17   | 2,6±0.16   | 1,08±0.014 | 0.13                   |
| Dimethylamine   | 7,1±0.95    | 4,16±0.027 | 2,3±0.51   | 3,7±0.29   | 3,3±0.52   | 1,6±0.54   | 1,87±0.089 | 1,4±0.29   | 0.18                   |
| Formaldehyde    | 7,3±0.69    | 6,6±0.31   | 3,89±1.05  | 2,14±0.074 | 2,1±0.13   | 1,65±0.041 | 3,32±0.065 | 2,12±0.071 | 0.11                   |
| Acetaldehyde    | 2,43±0.092  | 2,4±0.11   | 1,56±0.14  | 1,4±0.34   | 1,5±0.11   | 1,63±0.047 | 1,5±0.12   | 1,06±0.085 | 0.10                   |
| Acetone         | 4,3±0.13    | 6,1±0.18   | 3,89±0.043 | 4,2±0.26   | 4.0±0.18   | 3,5±0.24   | 4,7±0.29   | 1,94±0.047 | 0.04                   |
| Propionaldehyde | 0,26±0.010  | 0,23±0.017 | 0,16±0.020 | 0,10±0.022 | 0,13±0.026 | 0,13±0.015 | 0,17±0.013 | 0,11±0.023 | 0.13                   |
| Metacrolein     | 0,22        | 0,35       | 0,23       | 0,10       | 0,12       | 0,09       | 0,18       | 0,06       |                        |
| Butanone        | 0,47        | 0,35       | 0,26       | 0,68       | 0,78       | 0,60       | 0,29       | 0,07       |                        |
| Butanal         | 0,53        | 0,36       | 0,26       | 0,42       | 0,50       | 0,46       | 0,10       | 0,08       |                        |
| Benzaldehyde    | 0,70 ±0,081 | 1,8±0,13   | 1,6±0,16   | 0,83±0,052 | 1,2±0,17   | 1,1±0,15   | 0,8±0,10   | 0,53±0,070 | 0.10                   |
| Hexanal         | 0,20        | 0,17       | 0,18       | 0,11       | 0,14       | 0,12       | 0,15       | 0,15       |                        |
| Heptanal        | 0,23        | 0,13       | 0,15       | 0,03       | 0,04       | 0,04       | 0,04       | 0,04       |                        |
| Octanal         | 0,41        | 0,64       | 0,13       | 0,14       | 0,07       | 0,06       | 0,08       | 0,08       |                        |
| Nonanal         | 0,64        | 0,28       | 0,27       | 0,12       | 0,15       | 0,13       | 0,17       | 0,15       |                        |
| Decanal         | 0,55        | 0,18       | 0,13       | 0,04       | 0,07       | 0,05       | 0,11       | 0,06       |                        |
| Bencene         | 0,332       | 0,510      | 0,371      | 0,316      | 0,351      | 0,292      | 0,323      | 0,262      |                        |
| Toluene         | 0,818       | 1,492      | 0,913      | 0,585      | 0,348      | 0,269      | 0,809      | 0,673      |                        |
| Ethylbencene    | 0,165       | 0,321      | 0,212      | 0,108      | 0,087      | 0,056      | 0,224      | 0,147      |                        |
| m+p-xilene      | 0,422       | 0,624      | 0,533      | 0,306      | 0,226      | 0,188      | 0,582      | 0,454      |                        |
| o-xilene        | 0,187       | 0,308      | 0,229      | 0,124      | 0,095      | 0,075      | 0,243      | 0,166      |                        |
| a-pineno        | 0,048       | 0,048      | 0,066      | 0,043      | 0,031      | 0,039      | 0,234      | 0,161      |                        |

Table 5S – Variation of concentrations of PM ( $\mu\text{g m}^{-3}$ ), methylamine and dimethylamine ( $\text{ng m}^{-3}$ ), and thirteen carbonyl compounds ( $\mu\text{g m}^{-3}$ ) measured during a week-long sampling period at CIEMAT in July, 2022.

Results are given as the “*mean ± standard deviation*” obtained from duplicate analyses. Some carbonyl measurements could only be performed once. The intermediate precision was deduced from the relative standard deviations for each compound from the eight analysis batches.

|                  | MA            | DMA           | Formald       | Acetald       | Aceton        | Propionald    | Hexanal       | Heptanal      | Octanal       | Nonanal       | Decanal | Isoprene      | Benzene       | Toluene       | Ethyl-<br>benzene | m+p-<br>xylene | o-<br>xylene | $\alpha$ -<br>pinene |
|------------------|---------------|---------------|---------------|---------------|---------------|---------------|---------------|---------------|---------------|---------------|---------|---------------|---------------|---------------|-------------------|----------------|--------------|----------------------|
| Dimethylamine    | 0,4392        |               |               |               |               |               |               |               |               |               |         |               |               |               |                   |                |              |                      |
| Formald          | <b>0,7603</b> | <b>0,7796</b> |               |               |               |               |               |               |               |               |         |               |               |               |                   |                |              |                      |
| Acetald          | 0,6183        | <b>0,7898</b> | <b>0,9038</b> |               |               |               |               |               |               |               |         |               |               |               |                   |                |              |                      |
| Aceton           | <b>0,8087</b> | 0,454         | 0,6175        | <b>0,7373</b> |               |               |               |               |               |               |         |               |               |               |                   |                |              |                      |
| Propionald       | 0,6925        | <b>0,7352</b> | <b>0,9624</b> | <b>0,919</b>  | 0,5968        |               |               |               |               |               |         |               |               |               |                   |                |              |                      |
| Hexanal          | 0,5833        | 0,4947        | <b>0,8068</b> | 0,5697        | 0,2293        | <b>0,7954</b> |               |               |               |               |         |               |               |               |                   |                |              |                      |
| Heptanal         | 0,5535        | <b>0,7424</b> | <b>0,894</b>  | <b>0,7693</b> | 0,3357        | <b>0,8587</b> | <b>0,8757</b> |               |               |               |         |               |               |               |                   |                |              |                      |
| Octanal          | 0,6866        | 0,6665        | <b>0,8844</b> | <b>0,8776</b> | <b>0,7177</b> | <b>0,7976</b> | 0,5205        | 0,6607        |               |               |         |               |               |               |                   |                |              |                      |
| Nonanal          | 0,4604        | <b>0,8494</b> | <b>0,8712</b> | <b>0,776</b>  | 0,2757        | <b>0,8824</b> | <b>0,8046</b> | <b>0,9398</b> | 0,6039        |               |         |               |               |               |                   |                |              |                      |
| Decanal          | 0,4378        | <b>0,8665</b> | <b>0,8484</b> | <b>0,7637</b> | 0,2661        | <b>0,8727</b> | <b>0,7508</b> | <b>0,8902</b> | 0,582         | <b>0,9917</b> |         |               |               |               |                   |                |              |                      |
| Isoprene         | 0,5813        | -0,2053       | 0,1657        | 0,1114        | 0,497         | 0,2526        | 0,0817        | -0,16         | 0,1552        | -0,1262       | -0,0867 |               |               |               |                   |                |              |                      |
| Benzene          | <b>0,7124</b> | 0,337         | 0,6318        | 0,6821        | 0,8513        | 0,5447        | 0,3796        | 0,4051        | <b>0,8057</b> | 0,2309        | 0,172   | 0,275         |               |               |                   |                |              |                      |
| Toluene          | <b>0,8559</b> | 0,3041        | <b>0,7606</b> | 0,5786        | 0,6456        | 0,6386        | 0,6088        | 0,547         | <b>0,822</b>  | 0,3832        | 0,3346  | 0,4242        | <b>0,7969</b> |               |                   |                |              |                      |
| Ethyl-benzene    | <b>0,8802</b> | 0,1734        | 0,6895        | 0,4918        | 0,6391        | 0,6057        | 0,6188        | 0,4643        | 0,7038        | 0,3055        | 0,2601  | 0,5884        | <b>0,7564</b> | <b>0,9701</b> |                   |                |              |                      |
| m+p-xylene       | <b>0,8161</b> | 0,0525        | 0,5872        | 0,2942        | 0,4217        | 0,5118        | 0,6447        | 0,4208        | 0,512         | 0,2797        | 0,2415  | 0,6155        | 0,5193        | <b>0,8872</b> | <b>0,9495</b>     |                |              |                      |
| o-xylene         | <b>0,8862</b> | 0,1689        | 0,693         | 0,4664        | 0,5913        | 0,6169        | 0,6581        | 0,4937        | 0,661         | 0,3419        | 0,2984  | 0,5997        | 0,6876        | <b>0,9537</b> | <b>0,9934</b>     | <b>0,9746</b>  |              |                      |
| $\alpha$ -pinene | 0,1643        | -0,4657       | -0,1599       | -0,408        | -0,2078       | -0,0892       | 0,0803        | -0,2827       | -0,3077       | -0,2158       | -0,1721 | <b>0,7156</b> | -0,3243       | 0,1042        | 0,2817            | 0,5115         | 0,3456       |                      |

Table 6S - Coefficient of correlation among compounds measured. Statistically significant at the 95 % confidence level

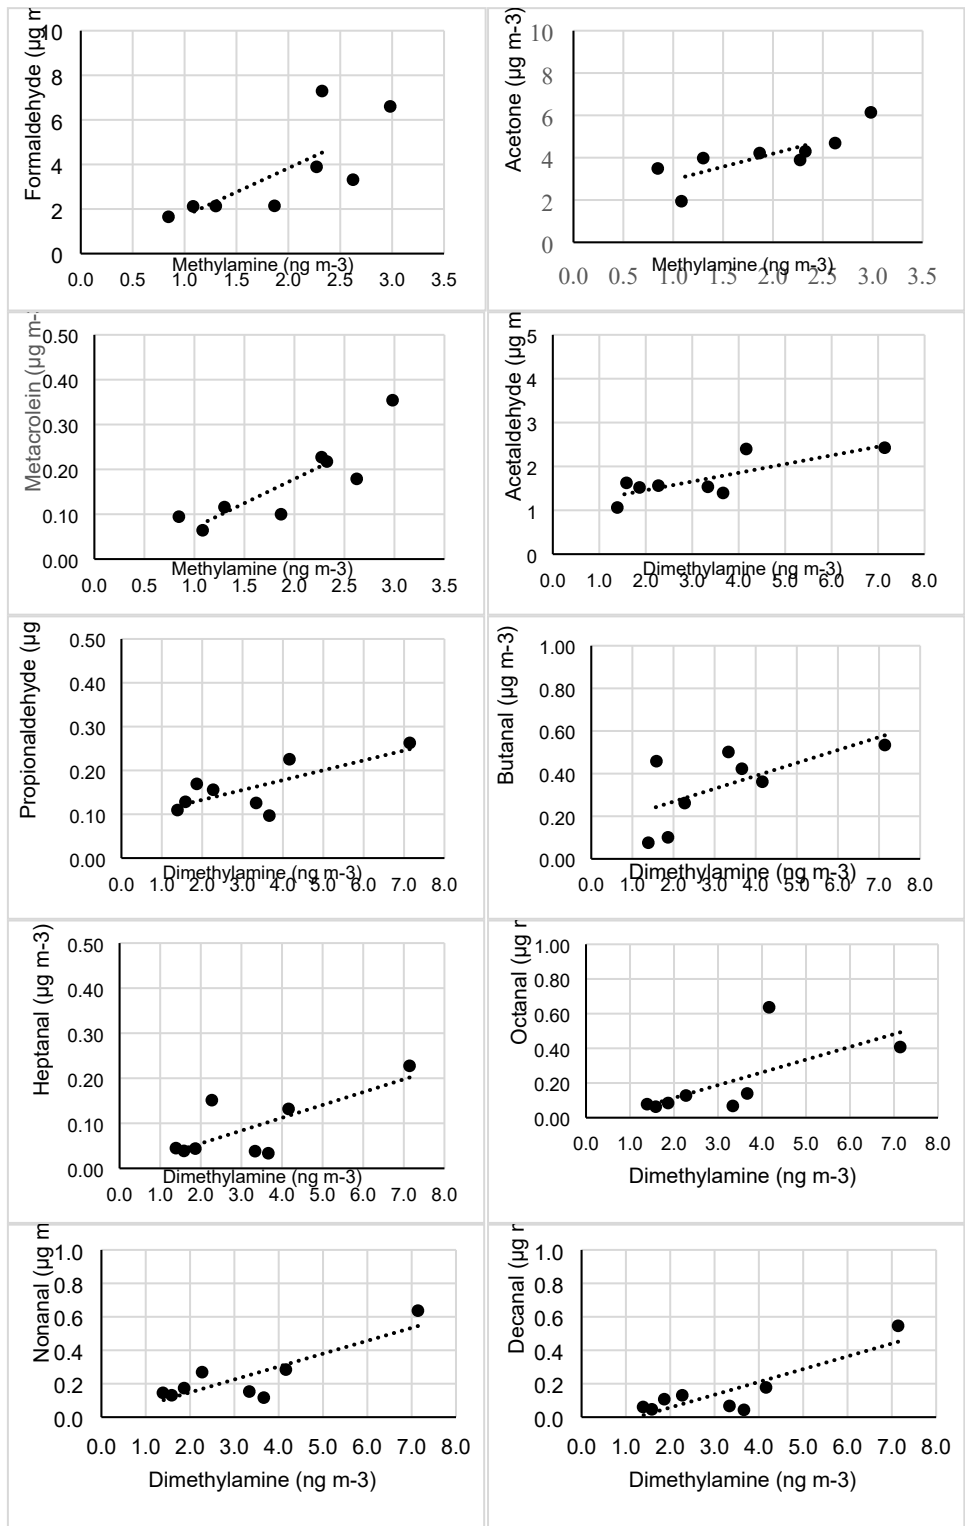

Figure 2S – Correlations between the concentration of methylamine and dimethylamine and some of the carbonyls measured during one week July (2021).



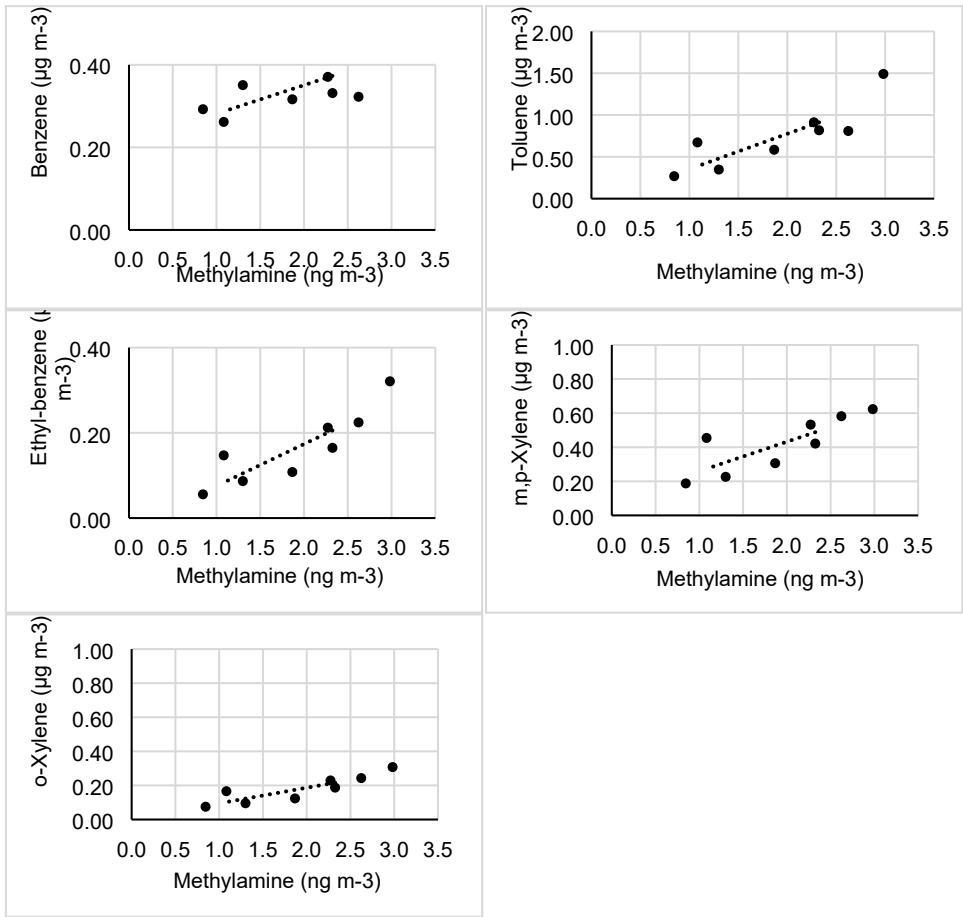

Figure 3S – Correlations between the concentration of methylamine and dimethylamine and benzene, toluene, ethylbenzene and xylenes measured during one week July (2021).
